# Supplementary material for: Palladium islands on iron oxide nanoparticles for hydrodesulfurization catalysis
Source: Royal Society of Chemistry journal article supplement (doi:10.1039/c8cy00088c), 2018-01-01
Supplement: c8cy00088c1.pdf [file c8cy00088c1.pdf]

## Supporting Information

### Palladium Islands on Iron Oxide Nanoparticles for Hydrodesulfurization Catalysis

Ali Mansouri, Natalia Semagina\*

Department of Chemical and Materials Engineering, University of Alberta, 9211-116 St., Edmonton, AB  
T6G 1H9, Canada. \* [semagina@ualberta.ca](mailto:semagina@ualberta.ca)

#### Nomenclature:

| Parameter               | Description                                          | Unit                 |
|-------------------------|------------------------------------------------------|----------------------|
| $\rho_b$                | catalyst bed density                                 | kg/m <sup>3</sup>    |
| $\rho_c$                | catalyst compact bulk density                        | kg/m <sup>3</sup>    |
| $\rho_g$                | gas density                                          | kg/m <sup>3</sup>    |
| $\phi$                  | catalyst bed porosity                                |                      |
| $\mu$                   | feed viscosity                                       | kg/m.s               |
| $\varepsilon_p$         | catalyst particle porosity                           |                      |
| $\tau$                  | catalyst tortuosity                                  |                      |
| b                       | bed dilution                                         |                      |
| $Bi_w$                  | Biot number at the reactor wall                      |                      |
| $C_i$                   | initial concentration of 4,6-DMDBT in feed stream    | mol/L                |
| $C_{Ab} \approx C_{As}$ | bulk (and surface) 4,6-DMDBT gas phase concentration | mol/m <sup>3</sup>   |
| $d_t$                   | reactor internal diameter                            | m                    |
| $d_p$                   | catalyst particle diameter                           | m                    |
| $d_{pore}$              | catalyst pore diameter                               | nm                   |
| $D_{AB}$                | 4,6-DMDBT diffusivity in H <sub>2</sub>              | m <sup>2</sup> /s    |
| $D_k$                   | Knudsen diffusivity                                  | m <sup>2</sup> /s    |
| $D_{pore}$              | diffusivity in a pore                                | m <sup>2</sup> /s    |
| $D_e$                   | effective diffusivity                                | m <sup>2</sup> /s    |
| $E_a$                   | activation energy                                    | kJ/mol               |
| $F_i$                   | inlet molar flow rate of 4,6-DMDBT                   | mol/s                |
| $H_{rxn}$               | heat of reaction                                     | kJ/mol               |
| h                       | heat transfer coefficient                            | kW/m <sup>2</sup> .K |
| $k_i$                   | observed reaction rate constant                      | L/kg.s               |

|               |                                                    |                       |
|---------------|----------------------------------------------------|-----------------------|
| $k_c$         | mass transfer coefficient                          | m/s                   |
| $k_{H_2}$     | thermal conductivity of hydrogen                   | W/m.K                 |
| $L_{bed}$     | catalyst bed length                                | m                     |
| $m_{cat.}$    | mass of catalyst in the reactor                    | kg                    |
| $M$           | molecular weight of 4,6-DMDBT                      | g/mol                 |
| $n$           | reaction order                                     |                       |
| $Nu$          | Nusselt number                                     |                       |
| $p$           | number of catalyst layers                          |                       |
| $P$           | operating pressure                                 | atm or Pa             |
| $-r_{A(obs)}$ | observed reaction rate                             | mol/kg.s              |
| $-r_{v(obs)}$ | observed reaction rate per unit of particle volume | mol/m <sup>3</sup> .s |
| $R$           | catalyst particle radius                           | m                     |
| $R_g$         | universal gas constant                             | J/mol.K               |
| $Re$          | Reynolds number                                    |                       |
| $R_t$         | Reactor internal radius                            | m                     |
| $S$           | BET surface area                                   | m <sup>2</sup> /g     |
| $Sh$          | Sherwood number                                    |                       |
| $T$           | reaction temperature                               | K                     |
| $T_w$         | Reactor wall temperature                           | K                     |
| $U$           | fluid superficial velocity                         | m/s                   |
| $v_i$         | molar diffusion volume                             | cm <sup>3</sup> /mol  |
| $X_i$         | 4,6-DMDBT HDS conversion                           |                       |

**Table S1.** Calculations on the absence of internal and external mass and heat transfer limitations and near-ideal plug flow behavior; the required parameters and calculation procedure are listed in Table S2.

| Phenomenon                                                                                              | criterion                                                                                                                                            | calculated value for the criterion |
|---------------------------------------------------------------------------------------------------------|------------------------------------------------------------------------------------------------------------------------------------------------------|------------------------------------|
| external heat transfer limitations [S1]                                                                 | $\Delta T_{film} = \frac{-r_{A(obs)} \times \rho_b \times R \times E_a \times (-\Delta H_{rxn})}{R_g \times h \times T^2} < 0.15$                    | $2.6 \times 10^{-6} < 0.15$        |
| external mass transfer limitations (Mears criterion) [S1]                                               | $\frac{-r_{A(obs)} \times R \times n \times \rho_b}{k_c \times C_{Ab}} < 0.15$                                                                       | $7.8 \times 10^{-4} < 0.15$        |
| internal mass transfer limitations (Weisz-Prater criterion for the 1 <sup>st</sup> order reaction) [S1] | $\frac{-r_{A(obs)} \times R^2 \times \rho_c}{D_e \times C_{As}} < 0.3$                                                                               | $0.03 < 0.3$                       |
| plug-flow behavior (no axial dispersion and wall effects) [S2, S3]                                      | $\frac{d_t}{d_p} > 10$<br>$\frac{L_{bed}}{d_p} > 50$                                                                                                 | $127 > 10$<br>$162 > 50$           |
| Radial temperature gradient                                                                             | $\frac{-r_{v(obs)} \times (1 - \varepsilon) \times (1 - b) \times E_a \times (-\Delta H_{rxn}) \times R_t^2}{R_g \times T_w^2 \times k_{H2}} \times$ | $6.2 \times 10^{-4} < 0.05$        |
| effect of bed dilution [S6]                                                                             | $0.6b/2p < \text{experimental error } 0.1$                                                                                                           | $0.042$                            |

**Table S2.** Calculation of parameters in Table S1 for FeO<sub>x</sub>@Pd<sub>0.2</sub>/Al<sub>2</sub>O<sub>3</sub> catalyst.

| Parameter        | Definition and Unit                                                                                                        | Equation and Value                                                                                   |
|------------------|----------------------------------------------------------------------------------------------------------------------------|------------------------------------------------------------------------------------------------------|
| $k_{i(obs)}$     | Observed rate constant @ 623 K and 4,6-DMDBT conversion of 35.9 % ( $X_{4,6-DMDBT}$ ) [L/kg.s]                             | $k_i = \frac{\ln\left(\frac{1}{1-X_i}\right) \times F_i}{C_i \times m_{cat.}} = 2.06 \times 10^{-3}$ |
| $-r_{A(obs)}$    | Observed reaction rate @ 623 K and $X_{4,6-DMDBT} = 35.9\%$ [mol/kg.s]                                                     | $-r_{A(obs)} = k_i \times C_i = 3.5 \times 10^{-5}$                                                  |
| $m_{cat.}$       | mass of catalyst in the reactor [g]                                                                                        | 0.18                                                                                                 |
| $F_i$            | 4,6-DMDBT molar flow rate [mol/s]                                                                                          | $1.41 \times 10^{-8}$                                                                                |
| $C_i$            | Initial concentration of 4,6-DMDBT [mol/L]                                                                                 | 0.017                                                                                                |
| $\rho_c$         | Catalyst compact bulk density [kg/m <sup>3</sup> ]                                                                         | 4000                                                                                                 |
| $\phi$           | Catalyst bed porosity                                                                                                      | 0.4                                                                                                  |
| $\rho_b$         | Catalyst bed density [kg/m <sup>3</sup> ]                                                                                  | $\rho_b = (1 - \phi) \times \rho_c = 2400$                                                           |
| R                | Catalyst particle radius [m]                                                                                               | 0.00005                                                                                              |
| $E_a$            | Activation energy for the 1 <sup>st</sup> order gas phase reaction [kJ/mol]                                                | 200 [S1]                                                                                             |
| $\Delta H_{rxn}$ | Heat of reaction calculated from the enthalpies of formation of each compounds in Scheme 1 provided in ref. [S4], [kJ/mol] | -148.5                                                                                               |
| Rg               | Universal gas constant [J/mol.K]                                                                                           | 8.314                                                                                                |
| T                | Reaction temperature [K]                                                                                                   | 623                                                                                                  |
| $d_p$            | Catalyst particle diameter [m]                                                                                             | 0.0001                                                                                               |
| $\rho_g$         | hydrogen gas density at 623 K and 3 MPa, [kg/m <sup>3</sup> ]                                                              | 1.17                                                                                                 |
| $\mu$            | hydrogen viscosity at 623 K [kg/m.s]                                                                                       | $1.42 \times 10^{-5}$                                                                                |
| Re               | Reynolds number at 623 K for the fluid velocity of 0.022 m/s (in the reactor i.d. 0.5") assuming the bed porosity of 0.4   | $Re = \frac{U \times \rho_g \times d_p}{(1 - \phi) \times \mu} = 0.18$                               |
| Sh, Nu           | Sherwood and Nusselt numbers                                                                                               | 2.0                                                                                                  |

|                         |                                                                                                                                                                                                               |                                                                                                                                                                                                   |
|-------------------------|---------------------------------------------------------------------------------------------------------------------------------------------------------------------------------------------------------------|---------------------------------------------------------------------------------------------------------------------------------------------------------------------------------------------------|
| $k_{H2}$                | Thermal conductivity of hydrogen at 623 K, [W/m.K]                                                                                                                                                            | 0.25                                                                                                                                                                                              |
| $h$                     | Heat transfer coefficient [kW/m <sup>2</sup> .K]                                                                                                                                                              | $h = \frac{Nu \times k_{H2}}{d_p} = 1.5$                                                                                                                                                          |
| $n$                     | Reaction order, HDS of 4,6-DMDBT on Pd-based catalyst is known to follow a pseudo-first-order kinetics [S5]                                                                                                   | 1.0                                                                                                                                                                                               |
| $C_{Ab} \approx C_{As}$ | Bulk 4,6-DMDBT gas phase concentration considering hydrogen gas [mol/m <sup>3</sup> ]                                                                                                                         | 0.107                                                                                                                                                                                             |
| $M$                     | 4,6-DMDBT molecular weight [g/mol]                                                                                                                                                                            | 212.3                                                                                                                                                                                             |
| $D_{AB}$                | Estimated gas phase 4,6-DMDBT diffusivity in H <sub>2</sub> at 623 K and 3 MPa [m <sup>2</sup> /s]; the molar volumes of H <sub>2</sub> and 4,6-DMDBT are 7.07 and 271.76 cm <sup>3</sup> /mol, respectively. | $D_{AB} = \frac{10^{-3} T^{1.75} \left[ \frac{1}{M_A} + \frac{1}{M_B} \right]^{0.5}}{P \left[ \left( \sum v_i \right)_A^{1/3} + \left( \sum v_i \right)_B^{1/3} \right]^2} = 2.61 \times 10^{-6}$ |
| $k_c$                   | Mass transfer coefficient [m/s]                                                                                                                                                                               | $k_c = \frac{D_{AB} \times Sh}{d_p} = 0.05$                                                                                                                                                       |
| $d_{pore}$              | Catalyst pore diameter [nm]                                                                                                                                                                                   | 5.8                                                                                                                                                                                               |
| $D_K$                   | Knudsen diffusivity [m <sup>2</sup> /s]                                                                                                                                                                       | $D_K = 48.5 \times d_{pore} \times \sqrt{\frac{T}{M}} = 4.8 \times 10^{-7}$                                                                                                                       |
| $D_{pore}$              | Diffusivity in a pore [m <sup>2</sup> /s]                                                                                                                                                                     | $D_{pore} = \left( \frac{1}{D_{AB}} + \frac{1}{D_K} \right)^{-1} = 4.1 \times 10^{-7}$                                                                                                            |
| $S$                     | BET surface area [m <sup>2</sup> /g]                                                                                                                                                                          | 155                                                                                                                                                                                               |
| $\varepsilon_p$         | Catalyst particle porosity                                                                                                                                                                                    | $\varepsilon_p = \frac{S \times \rho_c \times d_{pore}}{4} = 0.9$                                                                                                                                 |
| $\tau$                  | Catalyst tortuosity                                                                                                                                                                                           | 3.9                                                                                                                                                                                               |
| $D_e$                   | Effective diffusivity [m <sup>2</sup> /s]                                                                                                                                                                     | $D_e = \frac{\varepsilon_p \times D_{pore}}{\tau} = 9.5 \times 10^{-8}$                                                                                                                           |
| $d_t$                   | Reactor internal diameter [m]                                                                                                                                                                                 | 0.0127                                                                                                                                                                                            |
| $L_{bed}$               | Catalyst bed length [m]                                                                                                                                                                                       | 0.0162                                                                                                                                                                                            |
| $b$                     | Bed dilution [-]: 3.96 g SiC (density 3.21 g/cm <sup>3</sup> ), 0.18 g Al <sub>2</sub> O <sub>3</sub> (density 3.95 g/cm <sup>3</sup> )                                                                       | 0.964                                                                                                                                                                                             |

|                      |                                                                                                                                                 |                                                  |
|----------------------|-------------------------------------------------------------------------------------------------------------------------------------------------|--------------------------------------------------|
| l                    | Length of undiluted bed [m], 0.18 g Al <sub>2</sub> O <sub>3</sub><br>(density 3.95 g/cm <sup>3</sup> ), 0.4 bed porosity,<br>0.0127 m diameter | 0.0006                                           |
| p                    | Number of catalyst layers [S6]                                                                                                                  | p=1.1547 (l/d <sub>p</sub> ) = 6.93              |
| Bi <sub>w</sub>      | Biot number at the reactor wall                                                                                                                 | $Bi_w = \frac{h \times d_p}{k_{H2}} = 0.6$       |
| -r <sub>v(obs)</sub> | Observed reaction rate @ 623 K and X <sub>4,6</sub> -<br>DMDBT = 35.9 % [mol/m <sup>3</sup> .s]                                                 | $-r_{v(obs)} = -r_{A(obs)} \times \rho_c = 0.14$ |

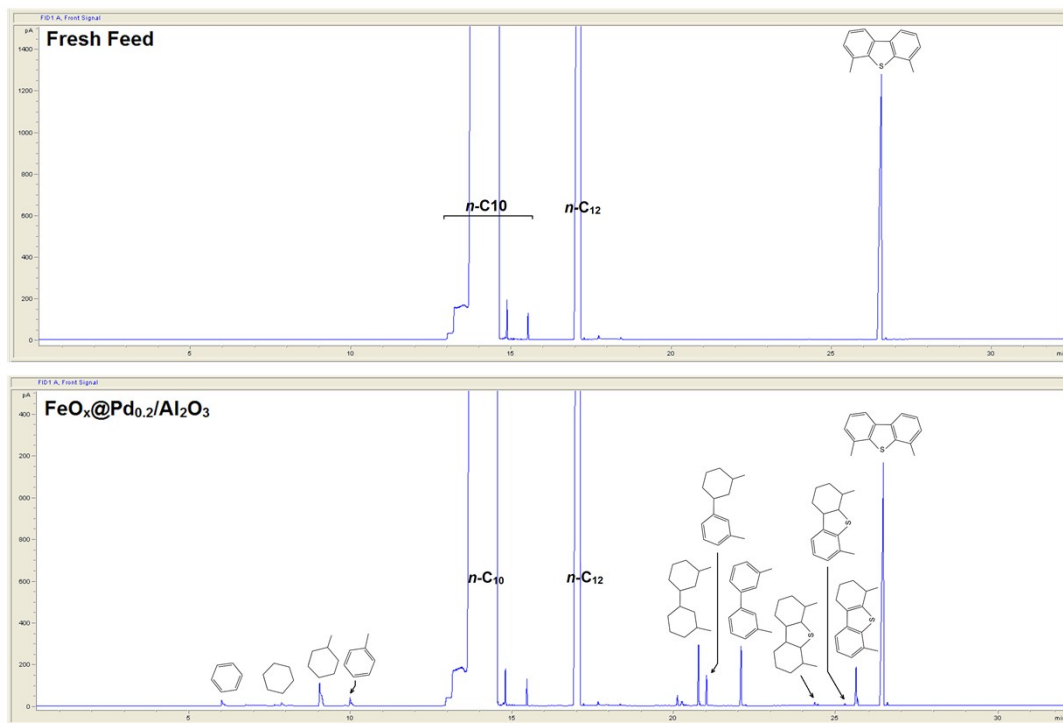

**Figure S1.** Typical GC chromatograms of fresh feed and HDS products at 623 K and 3 MPa over  $\text{FeO}_x\text{@Pd}_{0.2}/\text{Al}_2\text{O}_3$  catalyst collected after 18 h on stream. The hydrocracking product identification was performed by GC-MS:

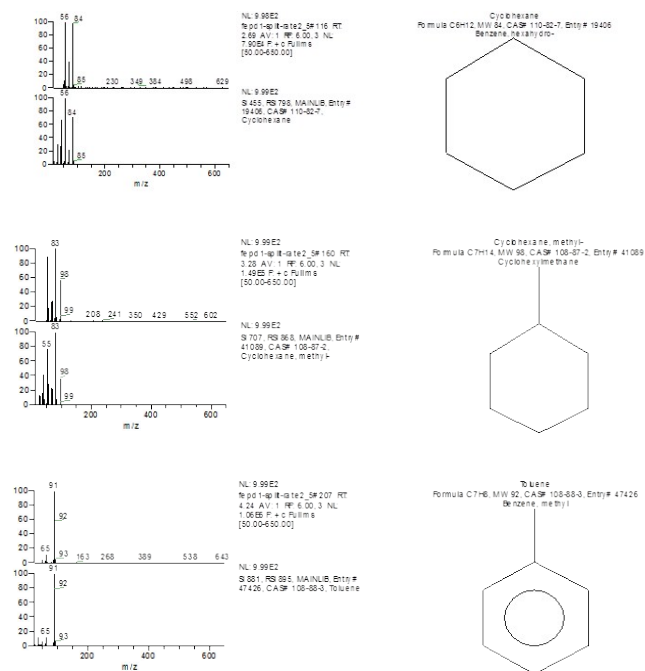

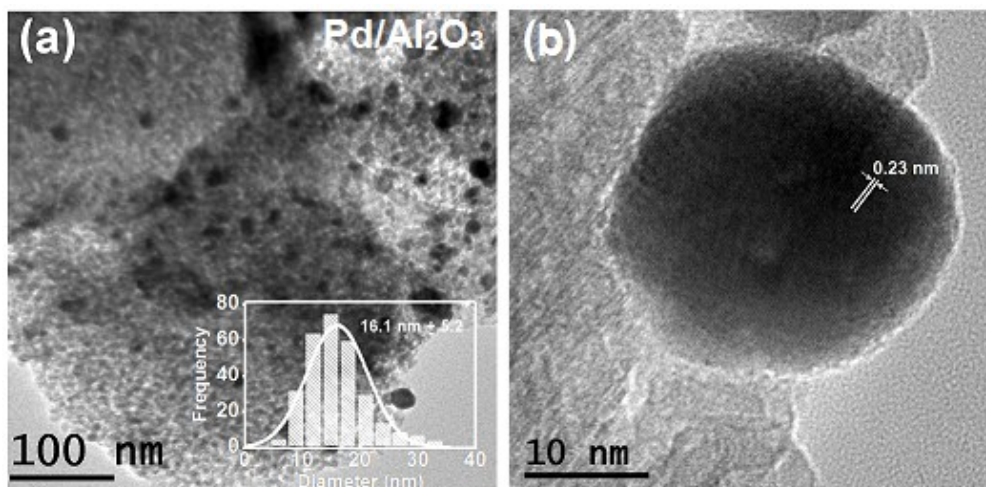

**Figure S2.** TEM (a) and HRTEM (b) images of spent Pd/Al<sub>2</sub>O<sub>3</sub> catalyst.

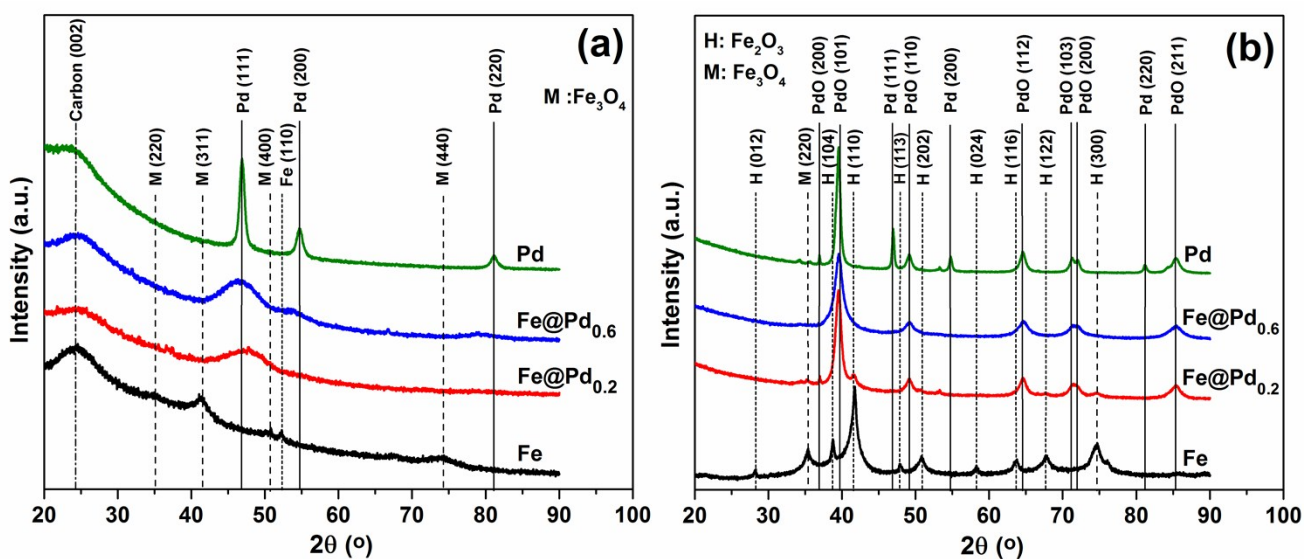

**Figure S3.** (a) XRD patterns of unsupported FeO<sub>x</sub>, Pd, and FeO<sub>x</sub>@Pd nanoparticles after synthesis, and (b) after 4 h of calcination at 673 K; M and H represent magnetite (Fe<sub>3</sub>O<sub>4</sub>) and hematite (Fe<sub>2</sub>O<sub>3</sub>), respectively. The peaks were assigned based on the powder diffraction file numbers 00-019-0629 for magnetite, 97-002-2505 for hematite, 00-006-0696 for metallic iron, 97-018-0870 for metallic palladium, and 00-006-0515 for PdO. Figure S3(a) was used to calculate the lattice parameters in Table 1. The high intensities at 20-30° range in Figure S3(a) are due to carbon in PVP (stabilizer), which disappeared after calcination in Figure S3(b).



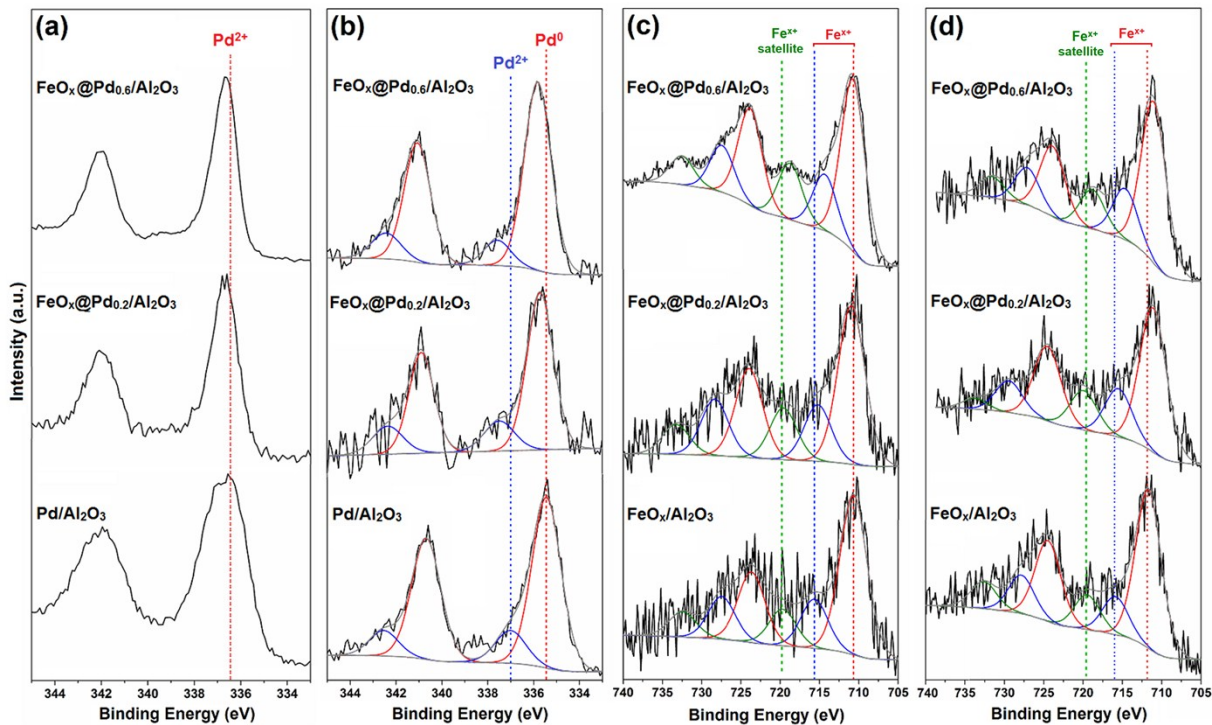

**Figure S4.** XPS profiles of Pd/Al<sub>2</sub>O<sub>3</sub>, FeO<sub>x</sub>/Al<sub>2</sub>O<sub>3</sub> and FeO<sub>x</sub>@Pd<sub>n</sub>/Al<sub>2</sub>O<sub>3</sub> catalysts: Pd 3d of calcined (a) and spent (b) catalysts; Fe 2p of calcined (c) and spent catalysts (d).

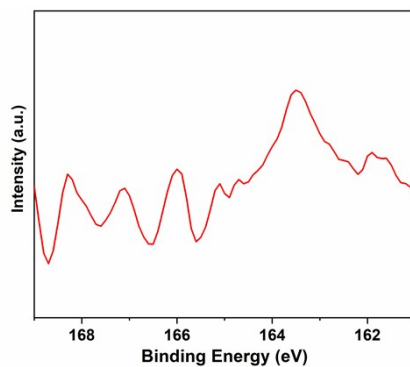

**Figure S5.** XPS profile of the sulfided FeO<sub>x</sub>@Pd<sub>n</sub> sample showing the presence of sulfides.

#### References:

- [S1] H.S. Fogler, Elements of chemical reaction engineering, 4<sup>th</sup> Ed., Prentice Hall, 2005.R.E.
- [S2] J. Perez-Ramirez, R.J. Berger, G. Mul, F. Kapteijn, J.A. Moulijn, Catal. Today 60 (2000) 93.
- [S3] J.F. Le Page, Applied heterogeneous catalysis, TechniP, 1987.
- [S4] Q. Yu, L. Zhang, R. Guo, J. Sun, W. Fu, T. Tang, T. Tang, Fuel Process. Technol. 159 (2017) 76-87.
- [S5] A. Niquille-Röthlisberger, R. Prins, J. Catal. 242 (2006) 207-216.
- [S6] C. M. Van Den Bleek, K. Van Der Wiele and P. J. Van Den Berg, Chem. Eng. Sci. 24 (1969) 681-694
